# Supplementary material
Source: MDPI journal article supplement (https://www.mdpi.com/2073-4344/12/10/1118)
Supplement: s1 [file s1]

---

**Supporting Information**

**A Highly Active NiMoAl Catalyst Prepared by Solvothermal  
Method for the Hydrogenation of Methyl Acrylate**

Taolue Sun <sup>a, c</sup>, Gang Wang <sup>b, c</sup>, Xinpeng Guo <sup>d</sup>, Zengxi Li, Erqiang Wang <sup>a, b, c \*</sup>,  
Chunshan Li <sup>c\*</sup>

<sup>a</sup> *Sino-Danish College, University of Chinese Academy of Sciences, Beijing 100049,  
People's Republic of China.*

<sup>b</sup> *School of Chemical Engineering, University of Chinese Academy of Sciences,  
Beijing 100049, People's Republic of China.*

<sup>c</sup> *Beijing Key Laboratory of Ionic Liquids Clean Process, Key Laboratory of  
Multiphase Complex Systems, Institute of Process Engineering, Innovation Academy  
for Green Manufacture, Chinese Academy of Sciences, Beijing 100190, People's  
Republic of China.*

<sup>d</sup> *School of Chemical Engineering, Xiangtan University, Hunan 411105, People's  
Republic of China.*

Corresponding E-mail: [wangerqiang@ucas.ac.cn](mailto:wangerqiang@ucas.ac.cn) (Prof. W. E. Qiang)

[csli@ipe.ac.cn](mailto:csli@ipe.ac.cn) (Prof. C. S. Li)

*\*Corresponding author*

Number of pages: 10

Number of tables: 2

Number of figure: 6

## Contents

| Figures                                                                                                                                                                                                                                             | Page |
|-----------------------------------------------------------------------------------------------------------------------------------------------------------------------------------------------------------------------------------------------------|------|
| <b>Figure S1</b> SEM images of (a) Mo <sub>10</sub> Al, (b) Ni <sub>10</sub> Al catalysts                                                                                                                                                           | S3   |
| <b>Figure S2.</b> TEM images of reduced Ni <sub>10</sub> Mo <sub>10</sub> /γ-Al <sub>2</sub> O <sub>3</sub> catalyst after reduction at 450 °C.                                                                                                     | S4   |
| <b>Figure S3.</b> XRD patterns of NiAl <sub>2</sub> O <sub>4</sub>                                                                                                                                                                                  | S5   |
| <b>Figure S4.</b> H <sub>2</sub> -TPR profiles of Ni <sub>10</sub> Al, Mo <sub>10</sub> Al, Ni <sub>10</sub> Mo <sub>10</sub> Al catalysts                                                                                                          | S6   |
| <b>Figure S5.</b> Effect of reduction temperature on the catalytic activity of Ni <sub>10</sub> Mo <sub>10</sub> Al catalyst at the reaction conditions of 100 °C, 1 MPa H <sub>2</sub> , n(H <sub>2</sub> )/n(MA) = 4 and WHSV = 2 h <sup>-1</sup> | S8   |
| <b>Figure S6.</b> TEM images of the used Ni <sub>10</sub> Mo <sub>10</sub> Al catalyst                                                                                                                                                              | S10  |
|                                                                                                                                                                                                                                                     |      |
| Tables                                                                                                                                                                                                                                              | Page |
| <b>Table S1.</b> Properties of NiAl <sub>2</sub> O <sub>4</sub> , Ni <sub>10</sub> Mo <sub>10</sub> Al and Ni <sub>10</sub> Mo <sub>10</sub> /γ-Al <sub>2</sub> O <sub>3</sub> catalysts                                                            | S7   |
| <b>Table S2.</b> ICP-OES results for the fresh and used Ni <sub>10</sub> Mo <sub>10</sub> Al catalyst                                                                                                                                               | S9   |

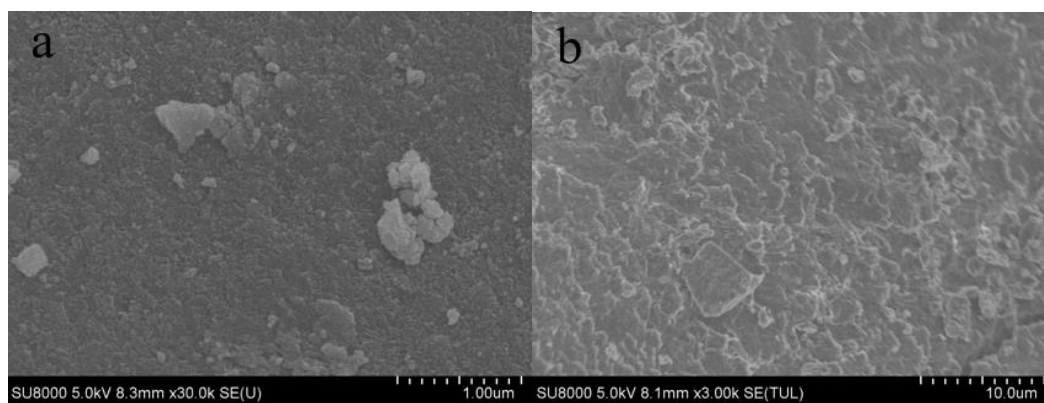

**Figure S1.** SEM images of (a)  $\text{Mo}_{10}\text{Al}$  and (b)  $\text{Ni}_{10}\text{Al}$  catalyst precursors

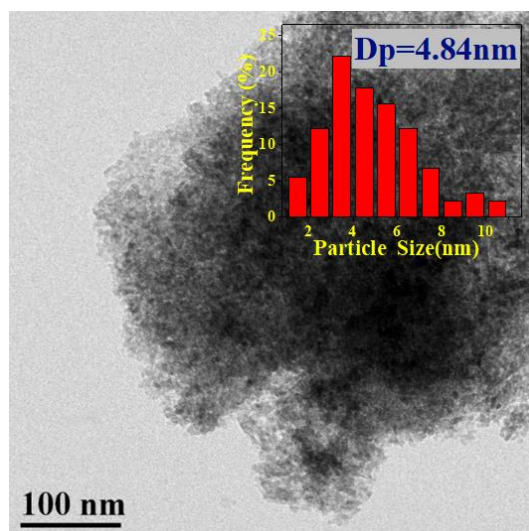

**Figure S2.** TEM image of reduced  $\text{Ni}_{10}\text{Mo}_{10}/\gamma\text{-Al}_2\text{O}_3$  catalyst after reduction at 450 °C

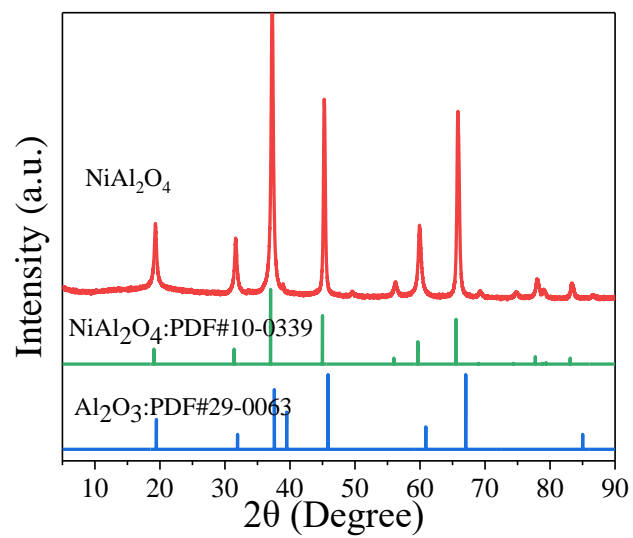

**Figure S3.** XRD patterns of  $\text{NiAl}_2\text{O}_4$

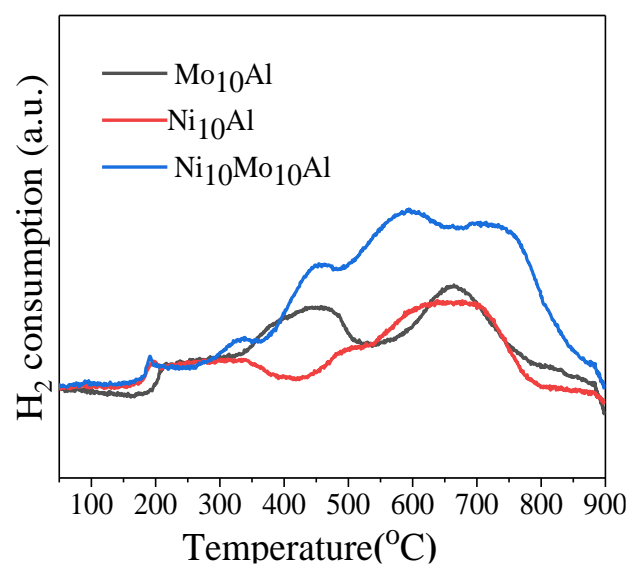

**Figure S4.** H<sub>2</sub>-TPR profiles of Ni<sub>10</sub>Al, Mo<sub>10</sub>Al, Ni<sub>10</sub>Mo<sub>10</sub>Al catalysts

**Table S1.** Properties of NiAl<sub>2</sub>O<sub>4</sub>, Ni<sub>10</sub>Mo<sub>10</sub>Al and Ni<sub>10</sub>Mo<sub>10</sub>/γ-Al<sub>2</sub>O<sub>3</sub> catalysts

| Catalyst                                                            | Yield <sup>a</sup><br>(%) | Ni content <sup>b</sup><br>(wt%) | Mo content <sup>b</sup><br>(wt%) | Mean particle Size <sup>c</sup><br>(nm) |
|---------------------------------------------------------------------|---------------------------|----------------------------------|----------------------------------|-----------------------------------------|
| Ni <sub>10</sub> Mo <sub>10</sub> Al                                | 89.5                      | 6.58                             | 6.07                             | 1.91                                    |
| Ni <sub>10</sub> Mo <sub>10</sub> /γ-Al <sub>2</sub> O <sub>3</sub> | 53.7                      | 7.52                             | 6.24                             | 4.84                                    |
| NiAl <sub>2</sub> O <sub>4</sub>                                    | 0.54                      | -                                | -                                | -                                       |

<sup>a</sup> Catalytic evaluation of NiAl<sub>2</sub>O<sub>4</sub>, Ni<sub>10</sub>Mo<sub>10</sub>Al and Ni<sub>10</sub>Mo<sub>10</sub>/γ-Al<sub>2</sub>O<sub>3</sub> catalysts at the reaction conditions of 100 °C, 1 MPa H<sub>2</sub>, n(H<sub>2</sub>)/n(MA) = 4 and WHSV = 2 h<sup>-1</sup>

<sup>b</sup> Content of Ni and Mo calculated on the ICP–OES analysis.

<sup>c</sup> Determined from TEM analysis.

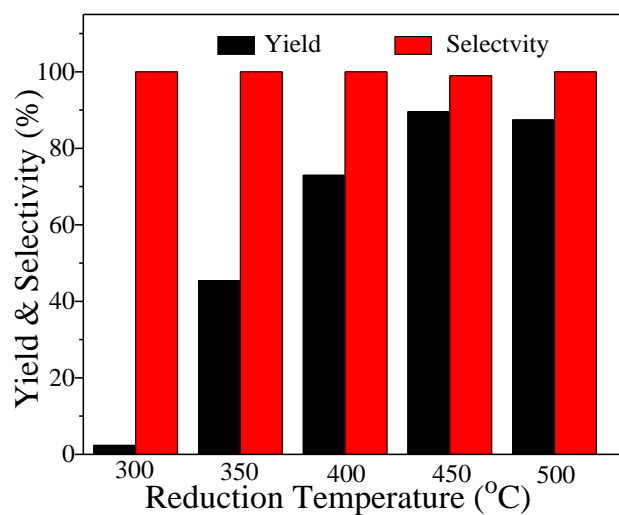

**Figure S5.** Effect of reduction temperature on the catalytic activity of  $\text{Ni}_{10}\text{Mo}_{10}\text{Al}$  catalyst at the reaction conditions of 100 °C, 1 MPa  $\text{H}_2$ ,  $n(\text{H}_2)/n(\text{MA}) = 4$  and  $\text{WHSV} = 2 \text{ h}^{-1}$



**Table S2.** ICP–OES results for the fresh and deactivated Ni<sub>10</sub>Mo<sub>10</sub>Al catalysts

| Catalyst                                     | Ni content<br>(wt%) | Mo content<br>(wt%) |
|----------------------------------------------|---------------------|---------------------|
| Ni <sub>10</sub> Mo <sub>10</sub> Al (fresh) | 6.58                | 6.07                |
| Ni <sub>10</sub> Mo <sub>10</sub> Al (used)  | 5.71                | 5.81                |

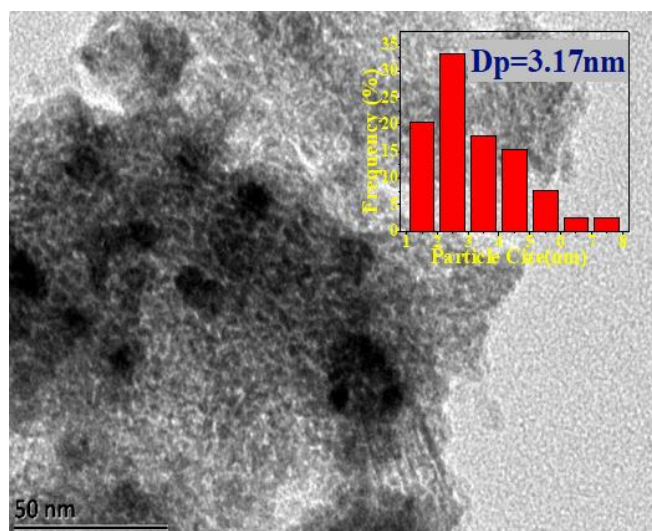

**Figure S6.** TEM images of the deactivated  $\text{Ni}_{10}\text{Mo}_{10}\text{Al}$  catalysts
